# Supplementary material for: An Integrated Inspection of the Somatic Mutations in a Lung Squamous Cell Carcinoma Using Next-Generation Sequencing
Source: PubMed Central journal article supplement (PMC3823931; doi:10.1371/journal.pone.0078823), 2013-11-11

**Supplemental Figure A. Expressed LUDLU-1 somatic mutations within protein-coding genes according to strand.** a) The number of expressed mutations that appear on the transcribed strand (TS) or non-transcribed strand (NTS); b) The relationship between protein-coding gene expression and mutation rate (mutations per Mb of at-risk bases in the gene footprint) for each mutation according to strand.

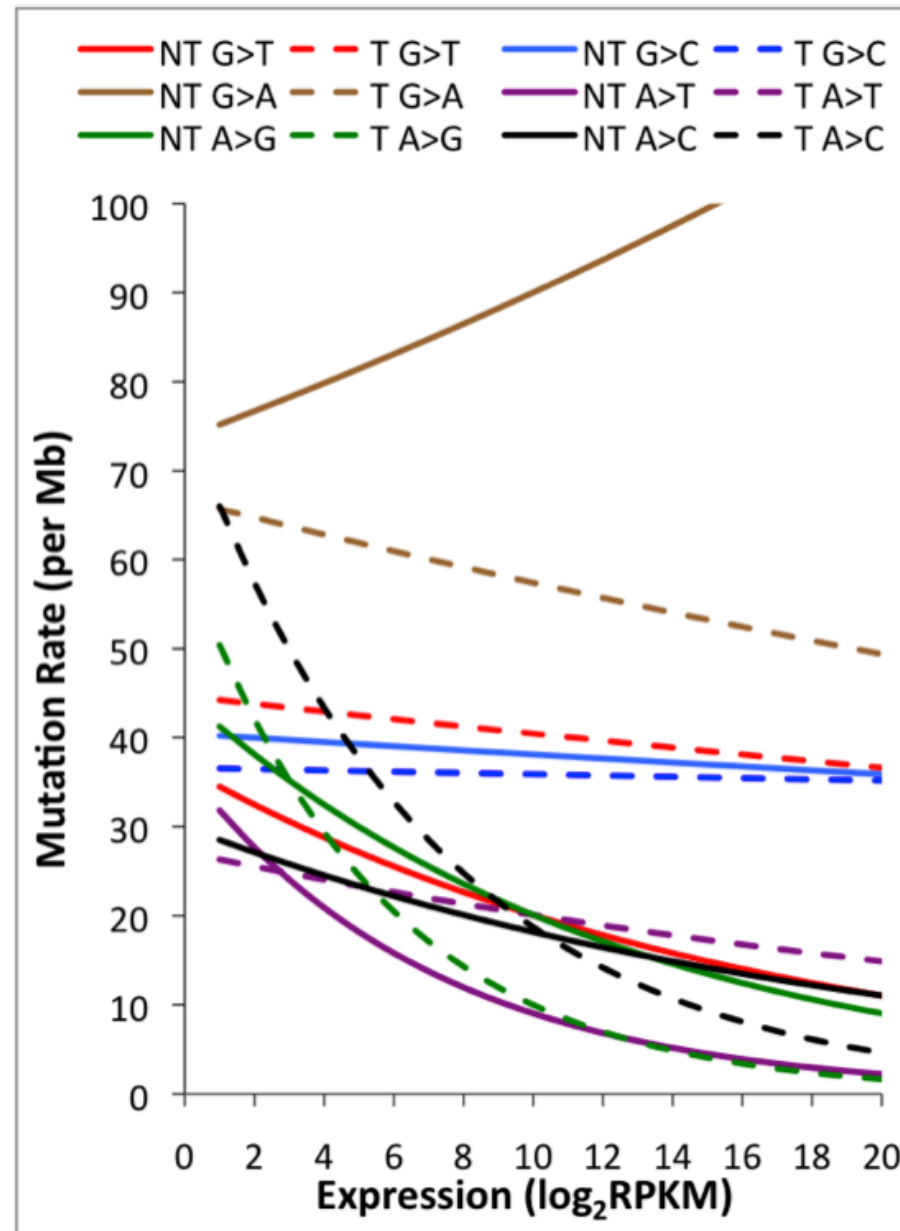

**Supplemental Figure B. Mutational profiles for A) LUDLU\_1, and B) Somatic Mutation Signature 5 as assigned in Alexandrov et al, Nature 2013 “Signatures of mutational processes in human cancer.”** The 6 main substitution types are shown in different colours, broken down by sequence context i.e. one base either side of the mutated base. This shows how consistent the LUDLU-1 mutational profile is with signature 5. The lower image is reprinted by permission from Macmillan Publishers Ltd: Nature, copyright 2013.

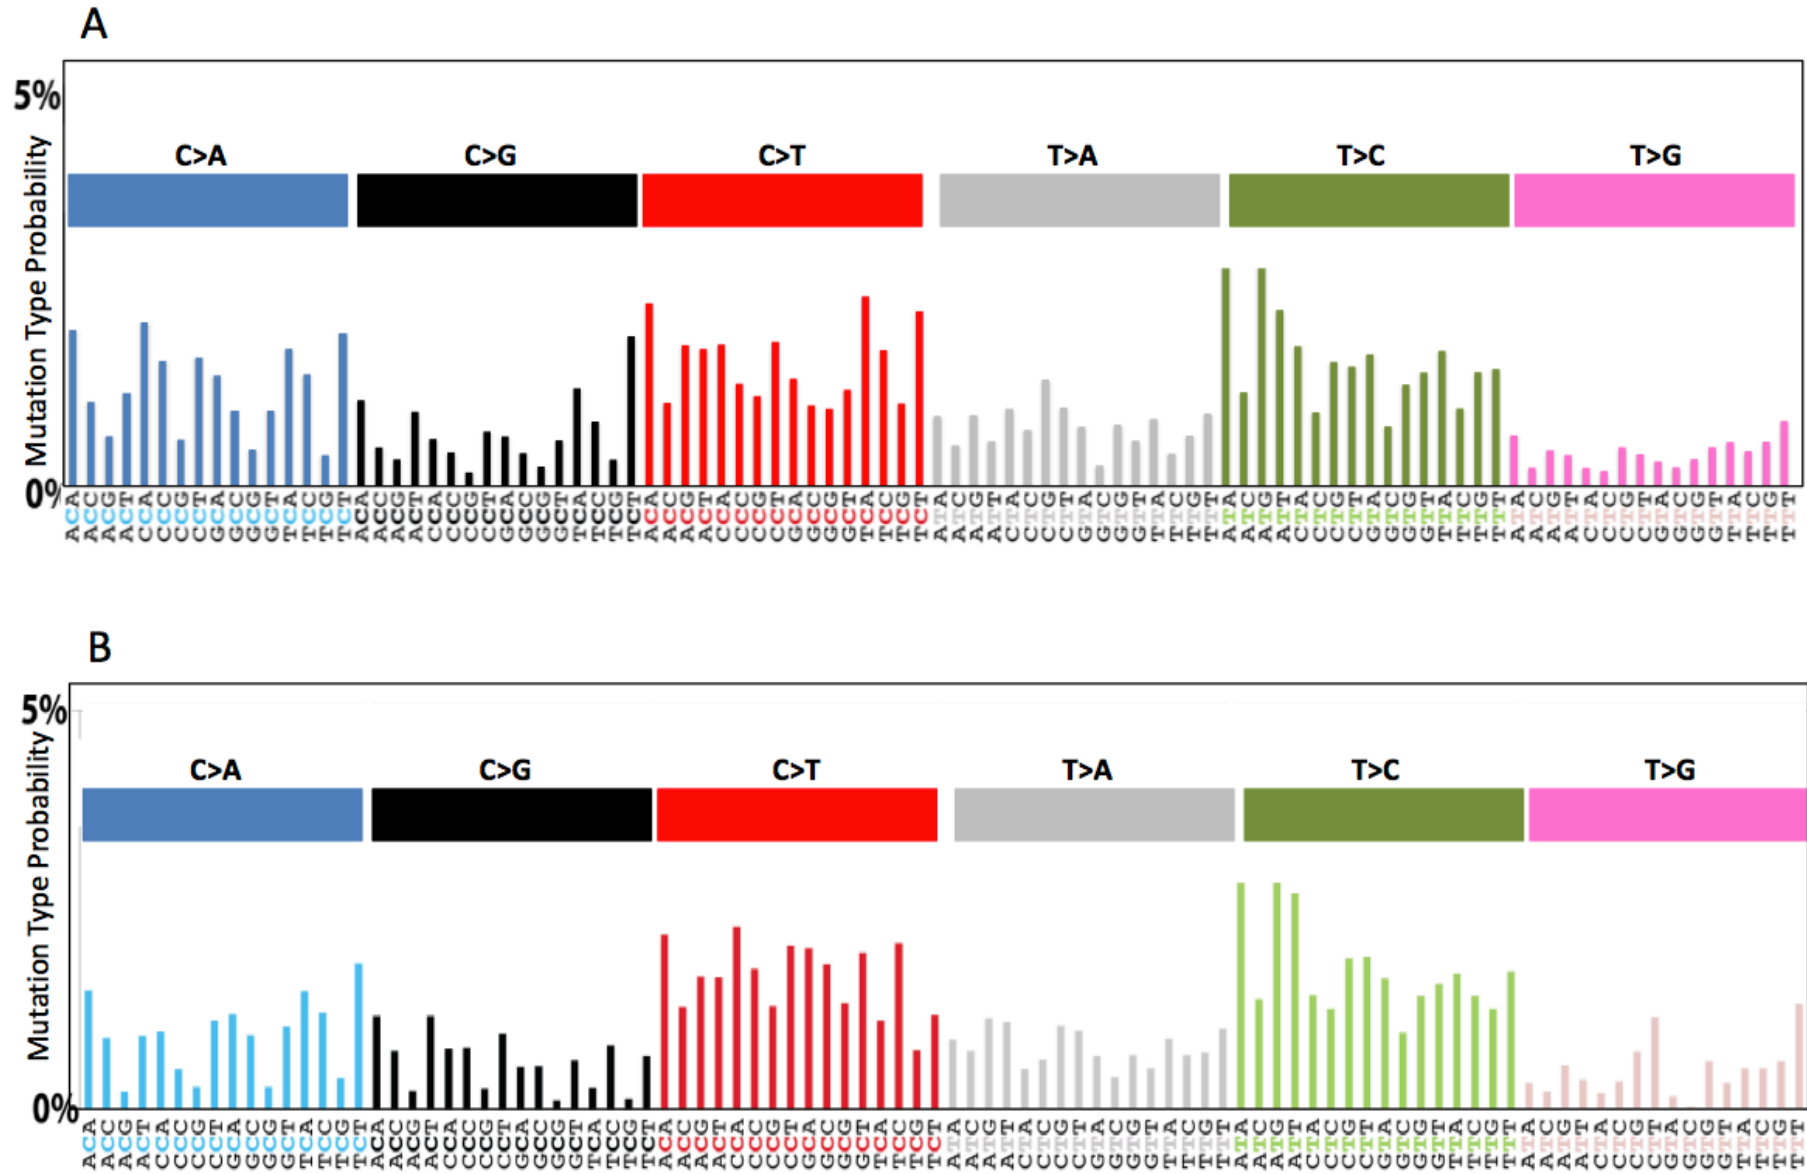

Supplement: pone.0078823.s001.pdf [file pone.0078823.s001.pdf]
